# Supplementary material for: The prognostic and predictive effect of body mass index in hormone receptor-positive breast cancer
Source: PubMed Central journal article supplement (PMC10697786; doi:10.1093/jncics/pkad092), 2023-11-22

## Supplementary materials

Supplement to: Lammers S.W.M., Geurts S.M.E., van Hellemond I.E.G. et al. The prognostic and predictive effect of body mass index in hormone receptor-positive breast cancer.

*Corresponding author:*

Vivianne C.G. Tjan-Heijnen, MD, PhD

ORCID ID: 0000-0002-3935-7440

Department of Medical Oncology, Maastricht University Medical Centre

P.O. Box 5800, 6202 AZ Maastricht, the Netherlands

Email: [vcg.tjan.heijnen@mumc.nl](mailto:vcg.tjan.heijnen@mumc.nl)

Phone: +31433877025

## Table of contents

|                                                                                                                                                                                                                                                                          |    |
|--------------------------------------------------------------------------------------------------------------------------------------------------------------------------------------------------------------------------------------------------------------------------|----|
| <b>Supplementary Table 1.</b> Baseline characteristics of study participants aged <60 years at randomisation according to BMI class (N (%)).....                                                                                                                         | 3  |
| <b>Supplementary Table 2.</b> Baseline characteristics of study participants aged ≥60 years at randomisation according to BMI class (N (%)).....                                                                                                                         | 4  |
| <b>Supplementary Table 3.</b> Baseline characteristics of normal weight patients who were disease-free at 3 years after randomisation according to assigned treatment (N (%)) .....                                                                                      | 5  |
| <b>Supplementary Table 4.</b> Baseline characteristics of overweight patients who were disease-free at 3 years after randomisation according to assigned treatment (N (%)) .....                                                                                         | 6  |
| <b>Supplementary Table 5.</b> Baseline characteristics of obese patients who were disease-free at 3 years after randomisation according to assigned treatment (N (%)).....                                                                                               | 7  |
| <b>Supplementary Table 6.</b> Multivariable analysis evaluating whether BMI is an independent prognostic factor for disease-free survival, accompanying Table 3 of the main manuscript.....                                                                              | 8  |
| <b>Supplementary Table 7.</b> Multivariable analysis evaluating whether BMI is an independent prognostic factor for overall survival, accompanying Table 3 of the main manuscript .....                                                                                  | 9  |
| <b>Supplementary Table 8.</b> Multivariable analysis evaluating whether BMI is an independent prognostic factor for breast cancer-specific mortality, accompanying Table 3 of the main manuscript.....                                                                   | 10 |
| <b>Supplementary Table 9.</b> Multivariable analysis evaluating whether BMI is an independent prognostic factor for other-cause mortality, accompanying Table 3 of the main manuscript.....                                                                              | 11 |
| <b>Supplementary Figure 1.</b> Multivariable analyses of adapted overall survival evaluating the efficacy of 6 versus 3 years of anastrozole in the total study population and age subgroups (<60 years versus ≥60 years), stratified by BMI class at randomisation..... | 12 |

**Supplementary Table 1.** Baseline characteristics of study participants aged <60 years at randomisation according to BMI class (N (%))

|                                               | Normal weight<br>(N = 449) | Overweight<br>(N = 392) | Obese<br>(N = 182) | P for trend |
|-----------------------------------------------|----------------------------|-------------------------|--------------------|-------------|
| Age at randomisation                          |                            |                         |                    | 0.002       |
| Median – years (IQR)                          | 51 (48 – 54)               | 52 (49 – 56)            | 53 (49 – 57)       |             |
| History of cardiovascular disease             |                            |                         |                    | <0.001      |
| Yes                                           | 60 (13)                    | 111 (28)                | 76 (42)            |             |
| Smoking history                               |                            |                         |                    | 0.42        |
| Non-smoker                                    | 200 (46)                   | 178 (47)                | 74 (41)            |             |
| Previous or current smoker                    | 238 (54)                   | 205 (54)                | 106 (59)           |             |
| Tumour classification                         |                            |                         |                    | 0.02        |
| pT1                                           | 217 (48)                   | 160 (41)                | 71 (39)            |             |
| pT2                                           | 186 (42)                   | 198 (51)                | 87 (48)            |             |
| pT3/4                                         | 45 (10)                    | 34 (9)                  | 24 (13)            |             |
| Nodal status                                  |                            |                         |                    | 0.58        |
| Negative                                      | 136 (30)                   | 111 (28)                | 52 (29)            |             |
| Positive                                      | 313 (70)                   | 281 (72)                | 130 (71)           |             |
| Histological grade                            |                            |                         |                    | 0.71        |
| Grade I                                       | 86 (20)                    | 55 (14)                 | 37 (21)            |             |
| Grade II                                      | 211 (48)                   | 203 (53)                | 89 (51)            |             |
| Grade III                                     | 139 (32)                   | 123 (32)                | 49 (28)            |             |
| Hormone receptor status                       |                            |                         |                    | 0.28        |
| ER and PR positive                            | 358 (80)                   | 301 (77)                | 139 (76)           |             |
| ER or PR positive                             | 91 (20)                    | 91 (23)                 | 43 (24)            |             |
| HER2 status                                   |                            |                         |                    | 0.12        |
| Positive                                      | 11 (3)                     | 18 (5)                  | 8 (5)              |             |
| Negative                                      | 409 (97)                   | 348 (95)                | 158 (95)           |             |
| Histology                                     |                            |                         |                    | 0.58        |
| Lobular                                       | 88 (20)                    | 56 (14)                 | 36 (20)            |             |
| Other                                         | 361 (80)                   | 336 (86)                | 146 (80)           |             |
| Breast-conserving surgery                     |                            |                         |                    | 0.39        |
| Yes                                           | 219 (49)                   | 200 (51)                | 95 (52)            |             |
| Prior (neo)adjuvant chemotherapy              |                            |                         |                    | 0.43        |
| Yes                                           | 414 (92)                   | 369 (94)                | 170 (93)           |             |
| Previous duration of tamoxifen                |                            |                         |                    | 0.62        |
| Median – years (IQR)                          | 2.3 (2.1 – 2.5)            | 2.3 (2.1 – 2.5)         | 2.3 (2.1 – 2.5)    |             |
| Recommended treatment duration of anastrozole |                            |                         |                    | 0.64        |
| 3 years                                       | 232 (52)                   | 186 (47)                | 93 (51)            |             |
| 6 years                                       | 217 (48)                   | 206 (53)                | 89 (49)            |             |

Abbreviations: BMI = body mass index; ER = oestrogen receptor; HER2 = human epidermal growth factor receptor 2; IQR = interquartile range; PR = progesterone receptor.

Percentages may exceed 100% because of rounding.

Missing values: smoking history (n = 22), tumour status (n = 1), histological grade (n = 31), and HER2 status (n = 71).

**Supplementary Table 2.** Baseline characteristics of study participants aged  $\geq 60$  years at randomisation according to BMI class (N (%))

|                                               | Normal weight<br>(N = 229) | Overweight<br>(N = 320) | Obese<br>(N = 209) | P for trend |
|-----------------------------------------------|----------------------------|-------------------------|--------------------|-------------|
| Age at randomisation                          |                            |                         |                    | 0.28        |
| Median – years (IQR)                          | 65 (62 – 71)               | 66 (62 – 72)            | 66 (62 – 71)       |             |
| History of cardiovascular disease             |                            |                         |                    | <0.001      |
| Yes                                           | 87 (38)                    | 142 (44)                | 128 (61)           |             |
| Smoking history                               |                            |                         |                    | 0.61        |
| Non-smoker                                    | 111 (50)                   | 164 (52)                | 108 (53)           |             |
| Previous or current smoker                    | 110 (50)                   | 152 (48)                | 97 (47)            |             |
| Tumour classification                         |                            |                         |                    | 0.16        |
| pT1                                           | 113 (50)                   | 146 (46)                | 88 (42)            |             |
| pT2                                           | 103 (45)                   | 157 (49)                | 109 (52)           |             |
| pT3/4                                         | 12 (5)                     | 17 (5)                  | 12 (6)             |             |
| Nodal status                                  |                            |                         |                    | 0.88        |
| Negative                                      | 82 (36)                    | 126 (39)                | 73 (35)            |             |
| Positive                                      | 147 (64)                   | 194 (61)                | 136 (65)           |             |
| Histological grade                            |                            |                         |                    | 0.64        |
| Grade I                                       | 36 (16)                    | 58 (18)                 | 31 (16)            |             |
| Grade II                                      | 115 (52)                   | 164 (52)                | 108 (55)           |             |
| Grade III                                     | 72 (32)                    | 94 (30)                 | 57 (29)            |             |
| Hormone receptor status                       |                            |                         |                    | 0.14        |
| ER and PR positive                            | 159 (69)                   | 220 (69)                | 159 (76)           |             |
| ER or PR positive                             | 70 (31)                    | 100 (31)                | 50 (24)            |             |
| HER2 status                                   |                            |                         |                    | 0.17        |
| Positive                                      | 4 (2)                      | 2 (1)                   | 1 (1)              |             |
| Negative                                      | 209 (98)                   | 287 (99)                | 191 (100)          |             |
| Histology                                     |                            |                         |                    | 0.34        |
| Lobular                                       | 47 (21)                    | 48 (15)                 | 51 (24)            |             |
| Other                                         | 182 (80)                   | 272 (85)                | 158 (76)           |             |
| Breast-conserving surgery                     |                            |                         |                    | 0.97        |
| Yes                                           | 112 (49)                   | 151 (47)                | 102 (49)           |             |
| Prior (neo)adjuvant chemotherapy              |                            |                         |                    | 0.28        |
| Yes                                           | 71 (31)                    | 109 (34)                | 75 (36)            |             |
| Previous duration of tamoxifen                |                            |                         |                    | 0.65        |
| Median – years (IQR)                          | 2.3 (2.1 – 2.5)            | 2.2 (2.1 – 2.5)         | 2.3 (2.1 – 2.5)    |             |
| Recommended treatment duration of anastrozole |                            |                         |                    | 0.22        |
| 3 years                                       | 105 (46)                   | 158 (49)                | 108 (52)           |             |
| 6 years                                       | 124 (54)                   | 162 (51)                | 101 (48)           |             |

Abbreviations: BMI = body mass index; ER = oestrogen receptor; HER2 = human epidermal growth factor receptor 2; IQR = interquartile range; PR = progesterone receptor.

Percentages may exceed 100% because of rounding.

Missing values: smoking history (n = 16), tumour status (n = 1), histological grade (n = 23), and HER2 status (n = 64).

**Supplementary Table 3.** Baseline characteristics of normal weight patients who were disease-free at 3 years after randomisation according to assigned treatment (N (%))

|                                                                                                                                                 | 6-year anastrozole<br>(N = 306) | 3-year anastrozole<br>(N = 307) | P-value |
|-------------------------------------------------------------------------------------------------------------------------------------------------|---------------------------------|---------------------------------|---------|
| Age at randomisation                                                                                                                            |                                 |                                 | 0.13    |
| Median – years (IQR)                                                                                                                            | 55 (51 – 62)                    | 54 (50 – 61)                    |         |
| Tumour status                                                                                                                                   |                                 |                                 | 0.49    |
| pT1                                                                                                                                             | 156 (51)                        | 142 (46)                        |         |
| pT2                                                                                                                                             | 126 (41)                        | 137 (45)                        |         |
| pT3/4                                                                                                                                           | 23 (8)                          | 27 (9)                          |         |
| Nodal status                                                                                                                                    |                                 |                                 | 0.37    |
| Node-negative                                                                                                                                   | 102 (33)                        | 113 (37)                        |         |
| Node-positive                                                                                                                                   | 204 (67)                        | 194 (63)                        |         |
| Histological grade                                                                                                                              |                                 |                                 | 0.19    |
| Grade I                                                                                                                                         | 50 (17)                         | 68 (23)                         |         |
| Grade II                                                                                                                                        | 155 (52)                        | 142 (48)                        |         |
| Grade III                                                                                                                                       | 92 (31)                         | 89 (30)                         |         |
| Hormone receptor status                                                                                                                         |                                 |                                 | 0.69    |
| ER and PR positive                                                                                                                              | 233 (76)                        | 238 (78)                        |         |
| ER or PR positive                                                                                                                               | 73 (24)                         | 69 (23)                         |         |
| HER2 status                                                                                                                                     |                                 |                                 | 0.26    |
| Positive                                                                                                                                        | 5 (2)                           | 9 (3)                           |         |
| Negative                                                                                                                                        | 284 (98)                        | 272 (97)                        |         |
| Histology                                                                                                                                       |                                 |                                 | 0.70    |
| Lobular                                                                                                                                         | 60 (20)                         | 64 (21)                         |         |
| Other                                                                                                                                           | 246 (80)                        | 243 (79)                        |         |
| Breast-conserving surgery                                                                                                                       |                                 |                                 | 0.44    |
| Yes                                                                                                                                             | 158 (52)                        | 149 (49)                        |         |
| Prior (neo)adjuvant chemotherapy                                                                                                                |                                 |                                 | 0.23    |
| Yes                                                                                                                                             | 217 (71)                        | 231 (75)                        |         |
| Previous duration of tamoxifen                                                                                                                  |                                 |                                 | 0.35    |
| Median – years (IQR)                                                                                                                            | 2.2 (2.1 – 2.5)                 | 2.3 (2.1 – 2.6)                 |         |
| Abbreviations: ER = oestrogen receptor; HER2 = human epidermal growth factor receptor 2; IQR = interquartile range; PR = progesterone receptor. |                                 |                                 |         |
| Percentages may exceed 100% because of rounding.                                                                                                |                                 |                                 |         |
| Missing values: tumour status (n = 2), histological grade (n = 17) and HER2 status (n = 43).                                                    |                                 |                                 |         |

**Supplementary Table 4.** Baseline characteristics of overweight patients who were disease-free at 3 years after randomisation according to assigned treatment (N (%))

|                                                                                                                                                 | <b>6-year anastrozole<br/>(N = 324)</b> | <b>3-year anastrozole<br/>(N = 304)</b> | <b>P-value</b> |
|-------------------------------------------------------------------------------------------------------------------------------------------------|-----------------------------------------|-----------------------------------------|----------------|
| Age at randomisation                                                                                                                            |                                         |                                         | 0.93           |
| Median – years (IQR)                                                                                                                            | 58 (52 – 64)                            | 58 (52 – 65)                            |                |
| Tumour status                                                                                                                                   |                                         |                                         | 0.64           |
| pT1                                                                                                                                             | 139 (43)                                | 138 (45)                                |                |
| pT2                                                                                                                                             | 164 (51)                                | 143 (47)                                |                |
| pT3/4                                                                                                                                           | 21 (7)                                  | 23 (8)                                  |                |
| Nodal status                                                                                                                                    |                                         |                                         | 0.25           |
| Node-negative                                                                                                                                   | 123 (38)                                | 102 (34)                                |                |
| Node-positive                                                                                                                                   | 201 (62)                                | 202 (66)                                |                |
| Histological grade                                                                                                                              |                                         |                                         | 0.85           |
| Grade I                                                                                                                                         | 52 (16)                                 | 53 (18)                                 |                |
| Grade II                                                                                                                                        | 167 (53)                                | 157 (53)                                |                |
| Grade III                                                                                                                                       | 98 (31)                                 | 87 (29)                                 |                |
| Hormone receptor status                                                                                                                         |                                         |                                         | 0.57           |
| ER and PR positive                                                                                                                              | 243 (75)                                | 222 (73)                                |                |
| ER or PR positive                                                                                                                               | 81 (25)                                 | 82 (27)                                 |                |
| HER2 status                                                                                                                                     |                                         |                                         | 0.93           |
| Positive                                                                                                                                        | 9 (3)                                   | 9 (3)                                   |                |
| Negative                                                                                                                                        | 285 (97)                                | 273 (97)                                |                |
| Histology                                                                                                                                       |                                         |                                         | 0.40           |
| Lobular                                                                                                                                         | 48 (15)                                 | 38 (13)                                 |                |
| Other                                                                                                                                           | 276 (85)                                | 266 (88)                                |                |
| Breast-conserving surgery                                                                                                                       |                                         |                                         | 0.21           |
| Yes                                                                                                                                             | 173 (53)                                | 147 (48)                                |                |
| Prior (neo)adjuvant chemotherapy                                                                                                                |                                         |                                         | 0.41           |
| Yes                                                                                                                                             | 215 (66)                                | 211 (69)                                |                |
| Previous duration of tamoxifen                                                                                                                  |                                         |                                         | 0.53           |
| Median – years (IQR)                                                                                                                            | 2.2 (2.1 – 2.5)                         | 2.3 (2.1 – 2.5)                         |                |
| Abbreviations: ER = oestrogen receptor; HER2 = human epidermal growth factor receptor 2; IQR = interquartile range; PR = progesterone receptor. |                                         |                                         |                |
| Percentages may exceed 100% because of rounding.                                                                                                |                                         |                                         |                |
| Missing values: histological grade (n = 14) and HER2 status (n = 52).                                                                           |                                         |                                         |                |

**Supplementary Table 5.** Baseline characteristics of obese patients who were disease-free at 3 years after randomisation according to assigned treatment (N (%))

|                                                                                                                                                 | 6-year anastrozole<br>(N = 167) | 3-year anastrozole<br>(N = 181) | P-value |
|-------------------------------------------------------------------------------------------------------------------------------------------------|---------------------------------|---------------------------------|---------|
| Age at randomisation                                                                                                                            |                                 |                                 | 0.91    |
| Median – years (IQR)                                                                                                                            | 60 (53 – 66)                    | 61 (52 – 67)                    |         |
| Tumour status                                                                                                                                   |                                 |                                 | 0.35    |
| pT1                                                                                                                                             | 65 (39)                         | 84 (46)                         |         |
| pT2                                                                                                                                             | 88 (53)                         | 82 (45)                         |         |
| pT3/4                                                                                                                                           | 14 (8)                          | 15 (8)                          |         |
| Nodal status                                                                                                                                    |                                 |                                 | 0.04    |
| Node-negative                                                                                                                                   | 47 (28)                         | 70 (39)                         |         |
| Node-positive                                                                                                                                   | 120 (72)                        | 111 (61)                        |         |
| Histological grade                                                                                                                              |                                 |                                 | 0.14    |
| Grade I                                                                                                                                         | 33 (21)                         | 34 (19)                         |         |
| Grade II                                                                                                                                        | 89 (57)                         | 87 (50)                         |         |
| Grade III                                                                                                                                       | 33 (21)                         | 54 (31)                         |         |
| Hormone receptor status                                                                                                                         |                                 |                                 | 0.88    |
| ER and PR positive                                                                                                                              | 128 (77)                        | 140 (77)                        |         |
| ER or PR positive                                                                                                                               | 39 (23)                         | 41 (23)                         |         |
| HER2 status                                                                                                                                     |                                 |                                 | 0.48    |
| Positive                                                                                                                                        | 2 (1)                           | 4 (2)                           |         |
| Negative                                                                                                                                        | 149 (99)                        | 163 (98)                        |         |
| Histology                                                                                                                                       |                                 |                                 | 0.07    |
| Lobular                                                                                                                                         | 42 (25)                         | 31 (17)                         |         |
| Other                                                                                                                                           | 125 (75)                        | 150 (83)                        |         |
| Breast-conserving surgery                                                                                                                       |                                 |                                 | 0.83    |
| Yes                                                                                                                                             | 85 (51)                         | 90 (50)                         |         |
| Prior (neo)adjuvant chemotherapy                                                                                                                |                                 |                                 | 0.20    |
| Yes                                                                                                                                             | 109 (65)                        | 106 (59)                        |         |
| Previous duration of tamoxifen                                                                                                                  |                                 |                                 | 0.57    |
| Median – years (IQR)                                                                                                                            | 2.3 (2.1 – 2.5)                 | 2.2 (2.1 – 2.5)                 |         |
| Abbreviations: ER = oestrogen receptor; HER2 = human epidermal growth factor receptor 2; IQR = interquartile range; PR = progesterone receptor. |                                 |                                 |         |
| Percentages may exceed 100% because of rounding.                                                                                                |                                 |                                 |         |
| Missing values: histological grade (n = 18) and HER2 status (n = 30).                                                                           |                                 |                                 |         |

**Supplementary Table 6.** Multivariable analysis evaluating whether BMI is an independent prognostic factor for disease-free survival, accompanying Table 3 of the main manuscript

| Variables                                                                                                         |                             | HR   | 95% CI      | P-value |
|-------------------------------------------------------------------------------------------------------------------|-----------------------------|------|-------------|---------|
| BMI                                                                                                               |                             |      |             |         |
|                                                                                                                   | Overweight vs normal weight | 1.16 | 0.97 – 1.38 | 0.10    |
|                                                                                                                   | Obese vs normal weight      | 1.26 | 1.03 – 1.54 | 0.03    |
| Age                                                                                                               |                             |      |             |         |
|                                                                                                                   | ≥60 years vs <60 years      | 1.63 | 1.34 – 1.98 | <0.001  |
| History of cardiovascular disease                                                                                 |                             |      |             |         |
|                                                                                                                   | Yes vs no                   | 1.18 | 1.01 – 1.39 | 0.04    |
| Smoking history                                                                                                   |                             |      |             |         |
|                                                                                                                   | Yes vs no                   | 1.26 | 1.09 – 1.46 | 0.002   |
| Tumour status                                                                                                     |                             |      |             |         |
|                                                                                                                   | pT2 and pT3/4 vs pT1        | 1.37 | 1.17 – 1.60 | <0.001  |
| Nodal status                                                                                                      |                             |      |             |         |
|                                                                                                                   | pN positive vs pN negative  | 1.56 | 1.31 – 1.85 | <0.001  |
| Histology                                                                                                         |                             |      |             |         |
|                                                                                                                   | Lobular vs other            | 1.26 | 1.04 – 1.51 | 0.02    |
| Histological grade                                                                                                |                             |      |             |         |
|                                                                                                                   | Grade 3 vs grade 1 and 2    | 1.46 | 1.24 – 1.72 | <0.001  |
| Hormone receptor status                                                                                           |                             |      |             |         |
|                                                                                                                   | Single HR+ vs double HR+    | 1.05 | 0.89 – 1.24 | 0.58    |
| Previous chemotherapy                                                                                             |                             |      |             |         |
|                                                                                                                   | Yes vs no                   | 0.81 | 0.66 – 0.99 | 0.04    |
| Abbreviations: BMI = body mass index; CI = confidence interval; HR = hazard ratio; HR+ hormone receptor-positive. |                             |      |             |         |



**Supplementary Table 7.** Multivariable analysis evaluating whether BMI is an independent prognostic factor for overall survival, accompanying Table 3 of the main manuscript

| Variables                                                                                                         | HR   | 95% CI      | P-value |
|-------------------------------------------------------------------------------------------------------------------|------|-------------|---------|
| BMI                                                                                                               |      |             |         |
| Overweight vs normal weight                                                                                       | 1.20 | 0.97 – 1.48 | 0.10    |
| Obese vs normal weight                                                                                            | 1.16 | 0.91 – 1.48 | 0.23    |
| Age                                                                                                               |      |             |         |
| ≥60 years vs <60 years                                                                                            | 1.97 | 1.55 – 2.49 | <0.001  |
| History of cardiovascular disease                                                                                 |      |             |         |
| Yes vs no                                                                                                         | 1.27 | 1.05 – 1.53 | 0.02    |
| Smoking history                                                                                                   |      |             |         |
| Yes vs no                                                                                                         | 1.20 | 1.00 – 1.43 | 0.05    |
| Tumour status                                                                                                     |      |             |         |
| pT2 and pT3/4 vs pT1                                                                                              | 1.48 | 1.22 – 1.78 | <0.001  |
| Nodal status                                                                                                      |      |             |         |
| pN positive vs pN negative                                                                                        | 1.71 | 1.39 – 2.10 | <0.001  |
| Histology                                                                                                         |      |             |         |
| Lobular vs other                                                                                                  | 1.36 | 1.09 – 1.70 | 0.007   |
| Histological grade                                                                                                |      |             |         |
| Grade 3 vs grade 1 and 2                                                                                          | 1.67 | 1.37 – 2.04 | <0.001  |
| Hormone receptor status                                                                                           |      |             |         |
| Single HR+ vs double HR+                                                                                          | 1.09 | 0.89 – 1.33 | 0.42    |
| Previous chemotherapy                                                                                             |      |             |         |
| Yes vs no                                                                                                         | 0.73 | 0.58 – 0.93 | 0.01    |
| Abbreviations: BMI = body mass index; CI = confidence interval; HR = hazard ratio; HR+ hormone receptor-positive. |      |             |         |

**Supplementary Table 8.** Multivariable analysis evaluating whether BMI is an independent prognostic factor for breast cancer-specific mortality, accompanying Table 3 of the main manuscript

| Variables                                                                                                                          | sHR  | 95% CI      | P-value |
|------------------------------------------------------------------------------------------------------------------------------------|------|-------------|---------|
| BMI                                                                                                                                |      |             |         |
| Overweight vs normal weight                                                                                                        | 1.25 | 0.93 – 1.68 | 0.15    |
| Obese vs normal weight                                                                                                             | 1.36 | 0.97 – 1.91 | 0.07    |
| Age                                                                                                                                |      |             |         |
| ≥60 years vs <60 years                                                                                                             | 1.80 | 1.30 – 2.48 | <0.001  |
| History of cardiovascular disease                                                                                                  |      |             |         |
| Yes vs no                                                                                                                          | 0.91 | 0.68 – 1.21 | 0.50    |
| Smoking history                                                                                                                    |      |             |         |
| Yes vs no                                                                                                                          | 1.05 | 0.82 – 1.36 | 0.69    |
| Tumour status                                                                                                                      |      |             |         |
| pT2 and pT3/4 vs pT1                                                                                                               | 1.52 | 1.16 – 1.99 | 0.003   |
| Nodal status                                                                                                                       |      |             |         |
| pN positive vs pN negative                                                                                                         | 2.24 | 1.64 – 3.06 | <0.001  |
| Histology                                                                                                                          |      |             |         |
| Lobular vs other                                                                                                                   | 1.44 | 1.06 – 1.95 | 0.02    |
| Histological grade                                                                                                                 |      |             |         |
| Grade 3 vs grade 1 and 2                                                                                                           | 2.05 | 1.56 – 2.70 | <0.001  |
| Hormone receptor status                                                                                                            |      |             |         |
| Single HR+ vs double HR+                                                                                                           | 1.08 | 0.81 – 1.45 | 0.60    |
| Previous chemotherapy                                                                                                              |      |             |         |
| Yes vs no                                                                                                                          | 1.18 | 0.84 – 1.66 | 0.34    |
| Abbreviations: BMI = body mass index; CI = confidence interval; HR+ hormone receptor-positive; sHR = subdistribution hazard ratio. |      |             |         |

**Supplementary Table 9.** Multivariable analysis evaluating whether BMI is an independent prognostic factor for other-cause mortality, accompanying Table 3 of the main manuscript

| Variables                                                                                                                          | sHR  | 95% CI      | P-value |
|------------------------------------------------------------------------------------------------------------------------------------|------|-------------|---------|
| BMI                                                                                                                                |      |             |         |
| Overweight vs normal weight                                                                                                        | 1.12 | 0.83 – 1.52 | 0.45    |
| Obese vs normal weight                                                                                                             | 1.01 | 0.71 – 1.43 | 0.96    |
| Age                                                                                                                                |      |             |         |
| ≥60 years vs <60 years                                                                                                             | 1.99 | 1.38 – 2.88 | <0.001  |
| History of cardiovascular disease                                                                                                  |      |             |         |
| Yes vs no                                                                                                                          | 1.72 | 1.32 – 2.25 | <0.001  |
| Smoking history                                                                                                                    |      |             |         |
| Yes vs no                                                                                                                          | 1.35 | 1.04 – 1.74 | 0.02    |
| Tumour status                                                                                                                      |      |             |         |
| pT2 and pT3/4 vs pT1                                                                                                               | 1.25 | 0.96 – 1.62 | 0.10    |
| Nodal status                                                                                                                       |      |             |         |
| pN positive vs pN negative                                                                                                         | 1.17 | 0.88 – 1.56 | 0.28    |
| Histology                                                                                                                          |      |             |         |
| Lobular vs other                                                                                                                   | 1.18 | 0.85 – 1.63 | 0.32    |
| Histological grade                                                                                                                 |      |             |         |
| Grade 3 vs grade 1 and 2                                                                                                           | 1.14 | 0.85 – 1.51 | 0.39    |
| Hormone receptor status                                                                                                            |      |             |         |
| Single HR+ vs double HR+                                                                                                           | 1.07 | 0.80 – 1.43 | 0.65    |
| Previous chemotherapy                                                                                                              |      |             |         |
| Yes vs no                                                                                                                          | 0.50 | 0.35 – 0.71 | <0.001  |
| Abbreviations: BMI = body mass index; CI = confidence interval; HR+ hormone receptor-positive; sHR = subdistribution hazard ratio. |      |             |         |

**Supplementary Figure 1.** Multivariable analyses of adapted overall survival evaluating the efficacy of 6 versus 3 years of anastrozole in the total study population and age subgroups (<60 years versus ≥60 years), stratified by BMI class at randomisation

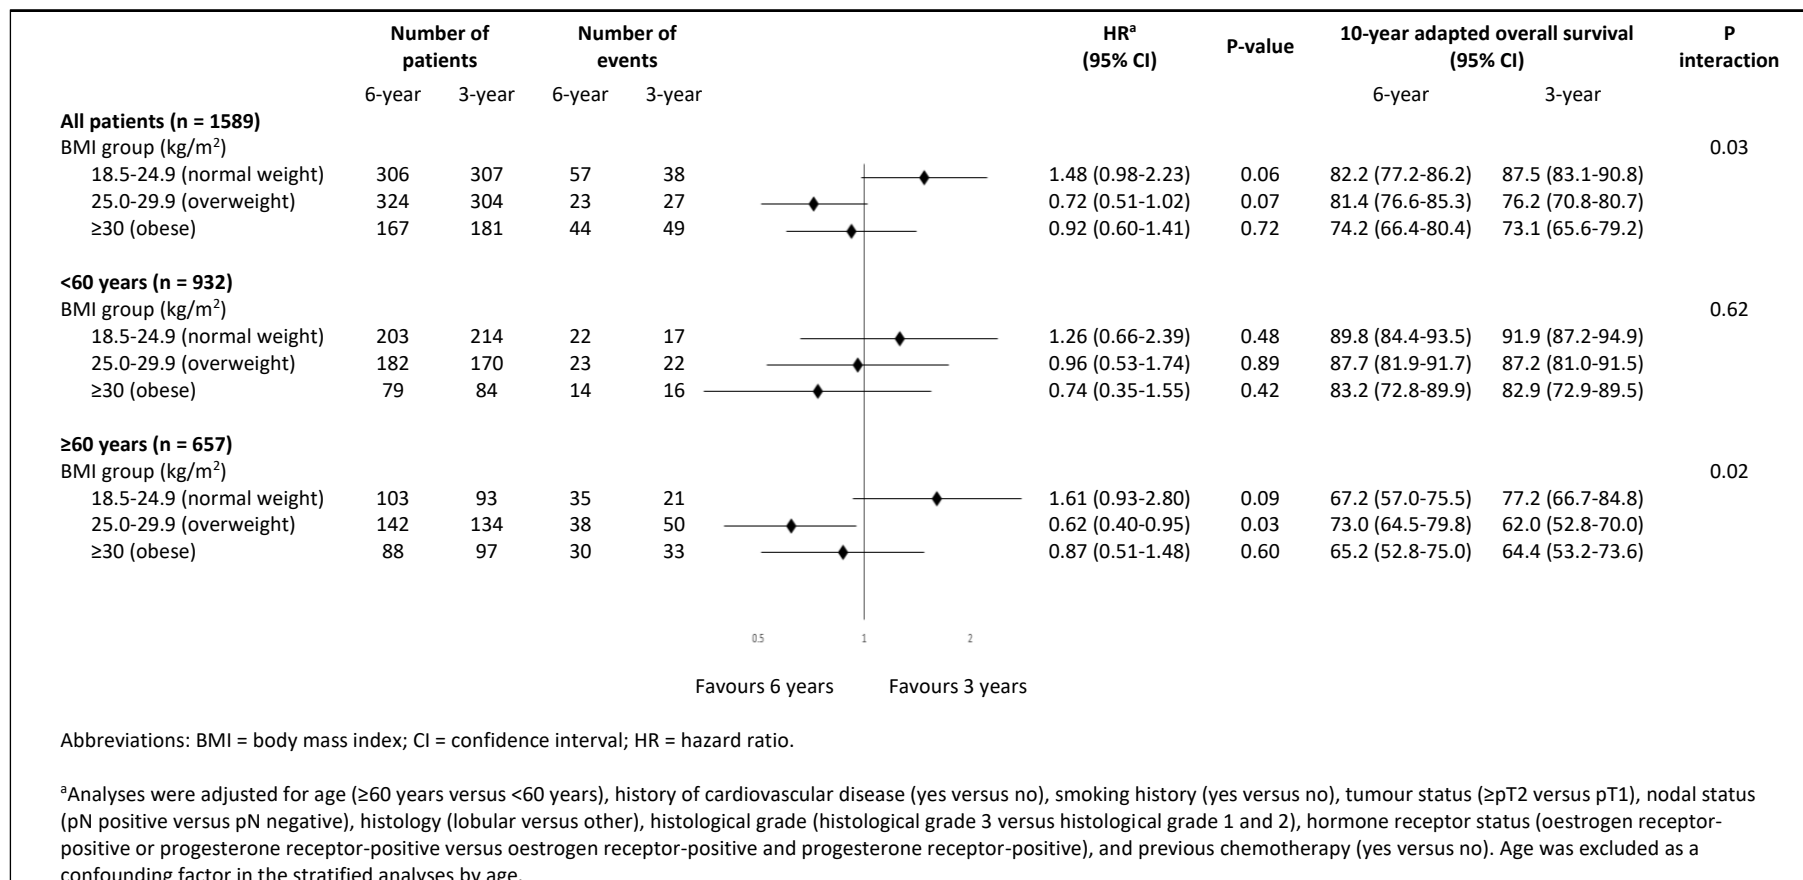

Supplement: pkad092_supplementary_data.pdf [file pkad092_supplementary_data.pdf]
